# Supplementary material for: A high-performance NiO/TiO2 UV photodetector: the influence of the NiO layer position
Source: Royal Society of Chemistry journal article supplement (doi:10.1039/d1tc02687a), 2021-01-01
Supplement: d1tc02687a1.pdf [file d1tc02687a1.pdf]

## Supporting information

### High-performance NiO/TiO<sub>2</sub> UV photodetector: Influence of NiO layers

Dongmei Yang, Fenqi Du, Yuxin Ren, Tianxin Kang, Peng Hu, Feng Teng\* and Haibo Fan\*

School of Physics, Northwest University, Xi'an 710127, China

\*Corresponding author: tengfeng@nwu.edu.cn (F. Teng); hbfan@nwu.edu.cn (H. B. Fan)

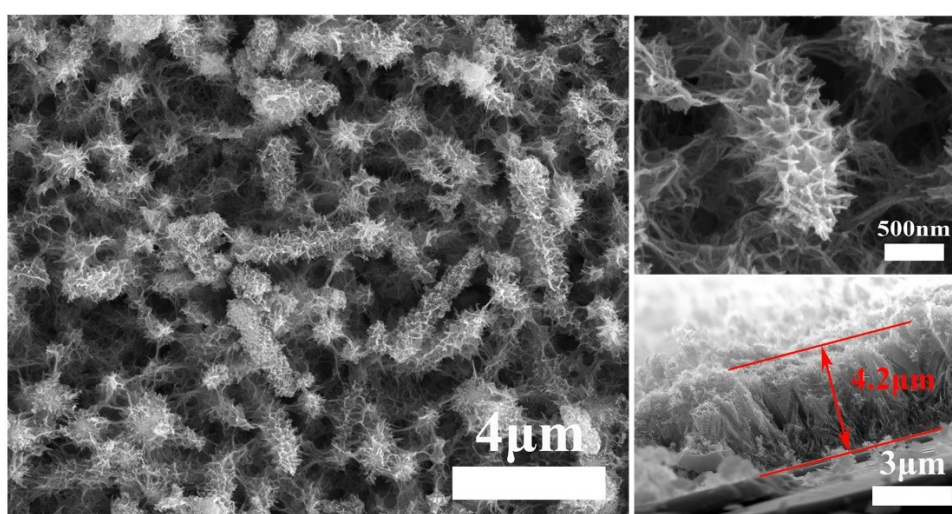

Fig. S1 Plane-view SEM images of TiO<sub>2</sub> NAs

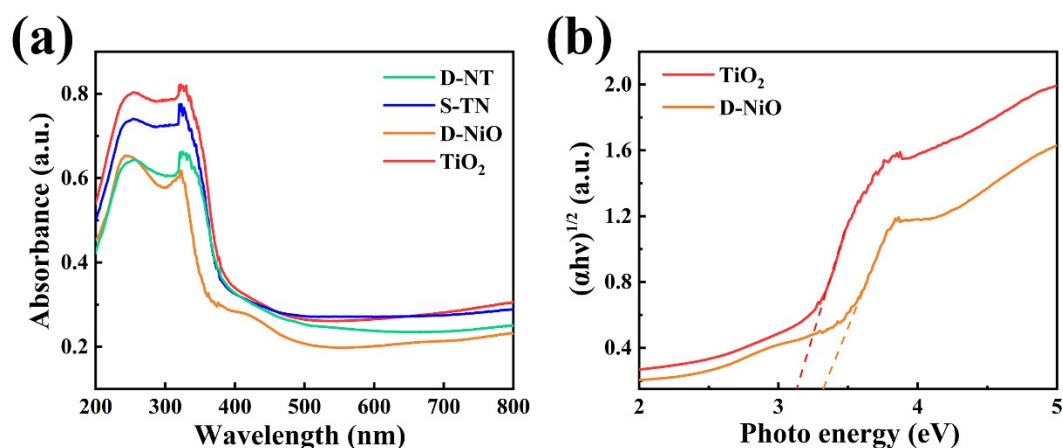

Fig. S2 (a) UV-vis diffuse reflectance spectra and (b) the corresponding plot analysis of optical band gap of TiO<sub>2</sub> NAs and TiO<sub>2</sub>/NiO heterojunction.

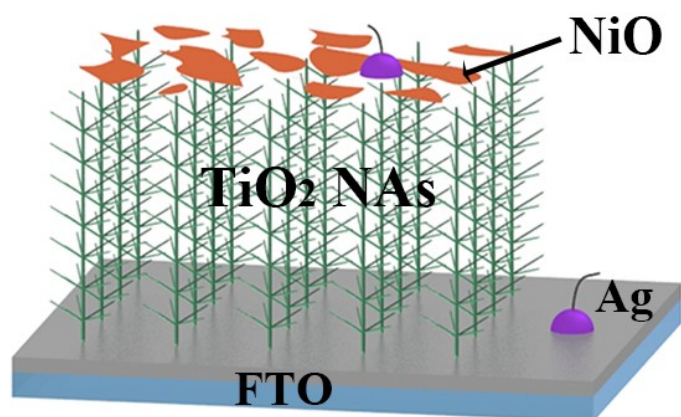

**Fig. S3** Schematic illustration for S-TN device.

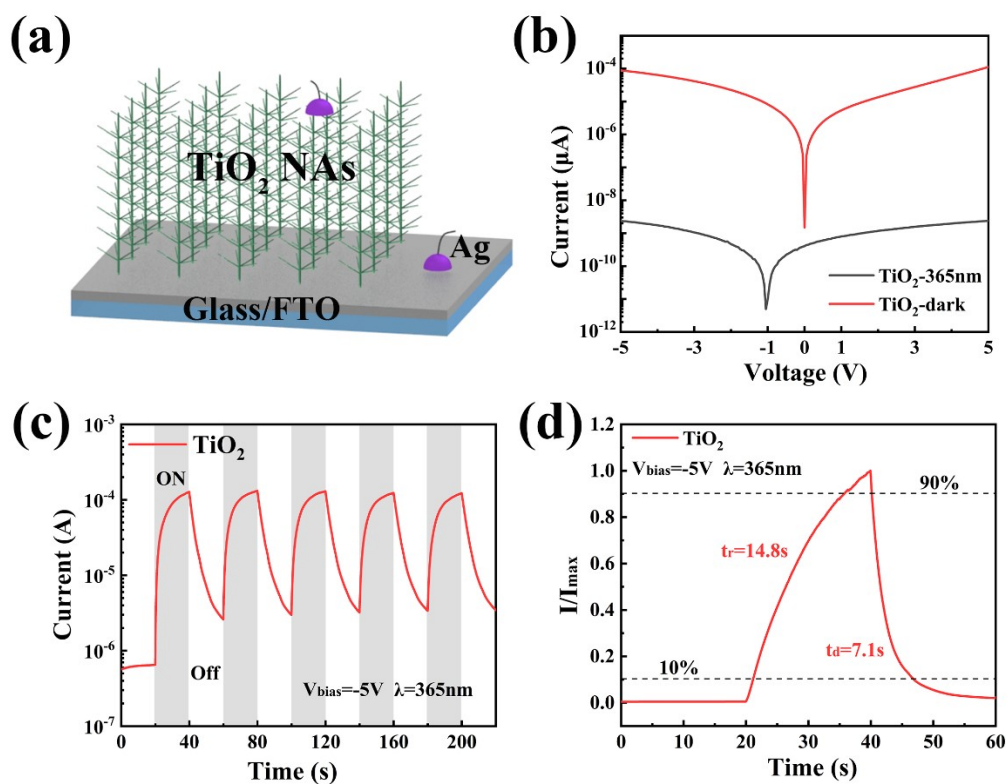

**Fig. S4** (a) Schematic illustration (b) Typical I-V curves in the dark and under illumination with 365 nm light. (c) I-t curves during light on-off switching tests at -5 V bias with 365 nm illumination and (d) A sharp rise and decay in the enlarged portions of a 20-40 s range and a 40-60 s range corresponding to the on-state and off-state at a bias voltage of -5 V for TiO<sub>2</sub> NAs.

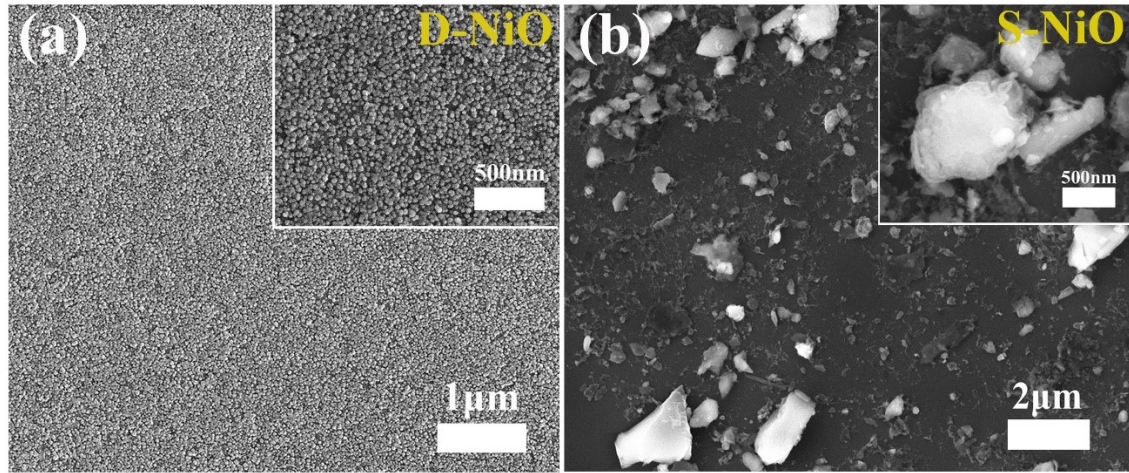

**Fig. S5** Plane-view SEM images of NiO: (a) D-NiO, (b) S-NiO.

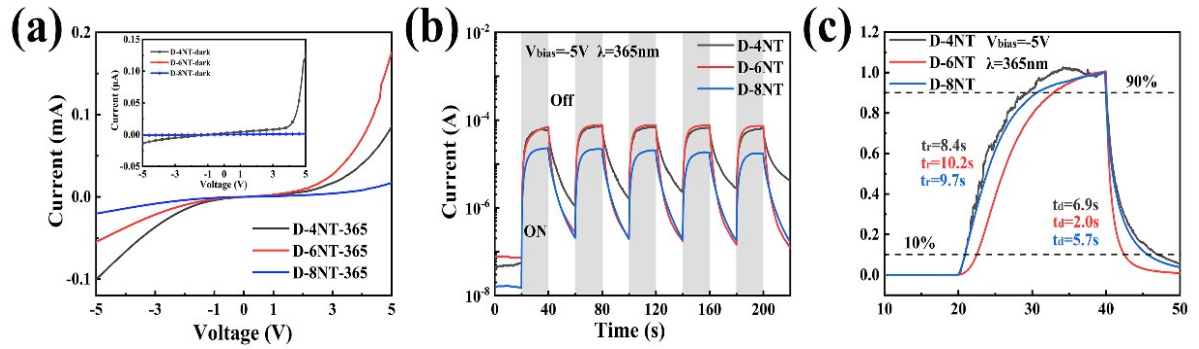

**Fig. S6** (a) Typical I-V curves in the dark and under illumination with 365 nm light. (c) I-t curves during light on-off switching tests at -5 V bias with 365 nm illumination and (d) A sharp rise and decay in the enlarged portions of a 20-40 s range and a 40-60 s range corresponding to the on-state and off-state at a bias voltage of -5 V for D-4NT, D-6NT and D-8NT.

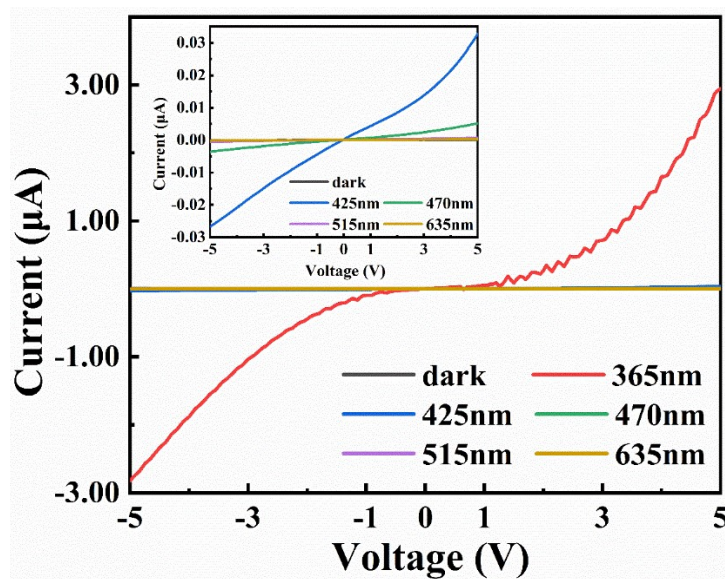

**Fig. S7** Typical I-V curves for D-NT in the dark and under illumination with 365, 425, 470, 515 and 635 nm light.

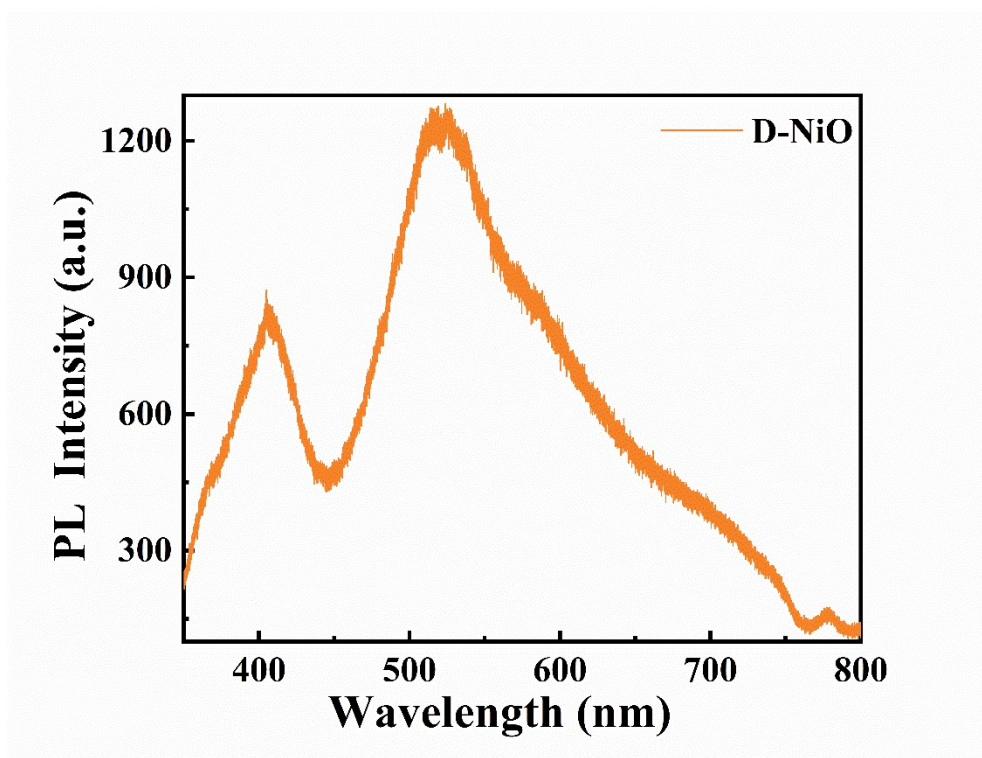

Fig. S8 PL spectra of D-NiO film.

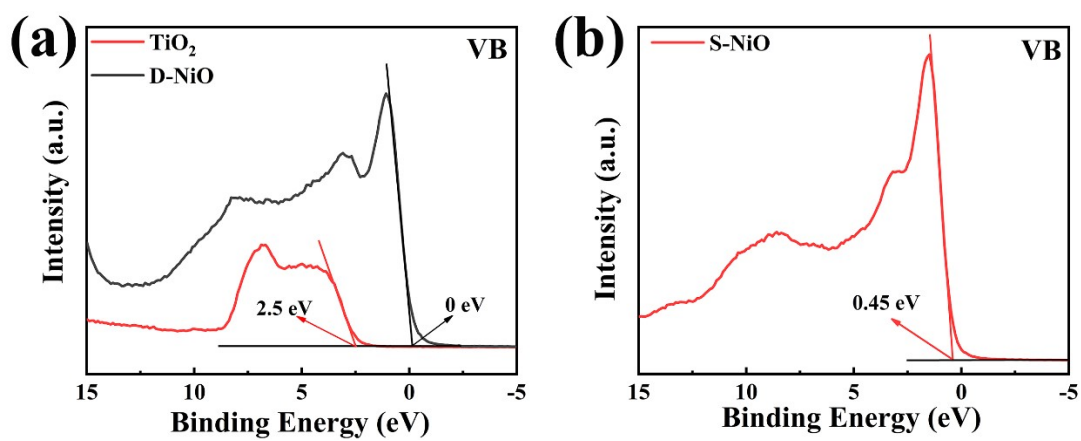

Fig. S9 The valence band spectra of TiO<sub>2</sub>, D-NiO and S-NiO.

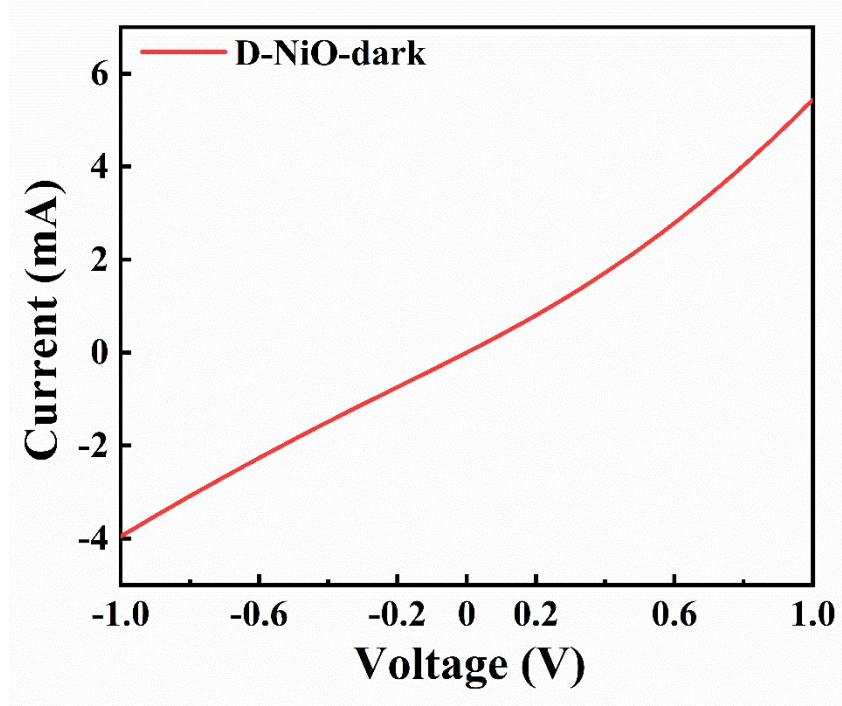

**Fig. S10** Typical I-V curves of D-NiO film in the dark.
